# Supplementary material
Source: Springer Nature journal article supplement (https://www.springermedizin.de/resource/supplementary/13256_2011_2246_MOESM1_ESM.pdf/9649186)
Supplement: MOESM1 [file 9649186]



23.2 mm

This is an axial CT scan of the chest. The image shows a cross-section of the thorax with the lungs, heart, and spine. A small, well-defined, rounded nodule is visible in the left lung, adjacent to the heart. A dashed line indicates the diameter of this nodule, which is labeled as 23.2 mm. The surrounding lung parenchyma appears normal with visible bronchovascular markings. The heart and mediastinal structures are also visible in the center of the scan.
